# Supplementary material for: Performance of Linear Mixed Models in Estimating Structural Rates of Glaucoma Progression Using Varied Random Effect Distributions
Source: PubMed Central journal article supplement — Ophthalmol Sci. 2023 Dec 13;4(3):100454. doi: 10.1016/j.xops.2023.100454 (PMC10838913; doi:10.1016/j.xops.2023.100454), 2023-12-13
Supplement: mmc1.pdf [file mmc1.pdf]

**Table 1.** List of International Classification of Diseases codes used to identify patients with or suspected of glaucoma.

| Inclusion ICD Codes                                                                             |                                                                                                 |                                                                                                                     |
|-------------------------------------------------------------------------------------------------|-------------------------------------------------------------------------------------------------|---------------------------------------------------------------------------------------------------------------------|
|                                                                                                 | ICD-9                                                                                           | ICD-10                                                                                                              |
| <b>Glaucoma suspect</b>                                                                         | 365.01, 365.02, 365.03, 365.04,<br>365.05, 365.06<br>377.14 <sup>a</sup><br>V19.11 <sup>b</sup> | H40.00X, H40.01X, H40.02X,<br>H40.03X, H40.04X, H40.05X,<br>H40.06X<br>H47.23X <sup>a</sup><br>Z83.511 <sup>b</sup> |
| <b>Open angle glaucoma</b>                                                                      | 365.10<br>365.11<br>365.12<br>365.13<br>365.14<br>365.15<br>365.52<br>365.7X                    | H40.1X<br>Q15.0                                                                                                     |
| <b>Chronic angle closure glaucoma (excluding acute angle closure)</b>                           | 365.20, 365.21, 365.23, 365.24                                                                  | H40.22X, H40.23X, H40.24X                                                                                           |
| <b>Traumatic glaucoma</b>                                                                       | 365.65                                                                                          | H40.3X                                                                                                              |
| <b>Uveitic glaucoma</b>                                                                         | 365.62                                                                                          | H40.4X                                                                                                              |
| <b>Glaucoma due to other disorders</b>                                                          | 365.63                                                                                          | H40.5X                                                                                                              |
| <b>Drug-induced glaucoma</b>                                                                    | 365.31, 365.32                                                                                  | H40.6X                                                                                                              |
| <b>Episcleral venous pressure-induced glaucoma, hypersecretion glaucoma, malignant glaucoma</b> | 365.81, 365.82, 365.83                                                                          | H40.8X                                                                                                              |

ICD: International Classification of Diseases

*X replaces any combination of numbers*

<sup>a</sup> Glaucomatous optic disc atrophy; in the absence of other ICD codes for glaucoma.

<sup>b</sup> Family history of glaucoma; in the absence of other ICD codes for glaucoma.
