# Supplementary material for: Performance of Linear Mixed Models in Estimating Structural Rates of Glaucoma Progression Using Varied Random Effect Distributions
Source: PubMed Central journal article supplement — Ophthalmol Sci. 2023 Dec 13;4(3):100454. doi: 10.1016/j.xops.2023.100454 (PMC10838913; doi:10.1016/j.xops.2023.100454), 2023-12-13
Supplement: mmc2.pdf [file mmc2.pdf]

**Table 2.** List of exclusionary International Classification of Diseases codes.

| <b>Exclusion ICD Codes</b>                                           |                                                                    |                                             |
|----------------------------------------------------------------------|--------------------------------------------------------------------|---------------------------------------------|
|                                                                      | <b>ICD-9</b>                                                       | <b>ICD-10</b>                               |
| <b>Age-related macular degeneration</b>                              | 362.5X                                                             | H35.31X <sup>a</sup><br>H35.32X             |
| <b>Amblyopia</b>                                                     | 368.0X                                                             | H53.0X                                      |
| <b>Intraocular tumors</b>                                            | 190.5X; 190.6X                                                     | C69.2X; C69.3X                              |
| <b>Optical neuritis and optic nerve and visual pathways diseases</b> | 377.X, except 377.14 <sup>b</sup>                                  | H46.X<br>H47.X, except H47.23X <sup>b</sup> |
| <b>Retinal detachment</b>                                            | 361.0X; 361.2X; 361.8X; 361.9X                                     | H33.0X; H33.2X; H33.4X                      |
| <b>Retinal vascular occlusions and ischemia</b>                      | 362.3X<br>362.84                                                   | H34.X<br>H35.82                             |
| <b>Uveitis and endophthalmitis</b>                                   | 360.0X; 360.1X<br>361.X<br>363.X<br>364.0X; 364.1X; 364.2X; 364.3X | H20.02X<br>H30.X<br>H44.0X; H44.1X          |
| <b>Proliferative diabetic retinopathy</b>                            | 362.02                                                             | E10.35X<br>E11.35X                          |
| <b>Other retinopathies</b>                                           | 362.1X, 362.2X                                                     | H35.0X, H35.7X, H35.8X                      |
| <b>Retinal dystrophies</b>                                           | 362.7X                                                             | H35.1X, H35.5X                              |

*ICD: International Classification of Diseases*

*X replaces any combination of numbers*

<sup>a</sup> Advanced and atrophic dry stages only.

<sup>b</sup> Glaucomatous optic disc atrophy.
